# Supplementary material for: Insights into the effects of polygalacturonase FaPG1 gene silencing on pectin matrix disassembly, enhanced tissue integrity, and firmness in ripe strawberry fruits
Source: PubMed Central journal article supplement — J Exp Bot. 2013 Jul 19;64(12):3803–15. doi: 10.1093/jxb/ert210 (PMC3745733; doi:10.1093/jxb/ert210), 2013-07-19

**Supplementary Figure 1:** Soluble solid content of control and transgenic ripe fruits from the transgenic lines APG29 and APG62 were evaluated for three consecutive years. Data represent the means  $\pm$  SD of 30 fruits per line. Bars with different letters within each year are significantly different by the Tukey-HSD test ( $P = 0.05$ ).

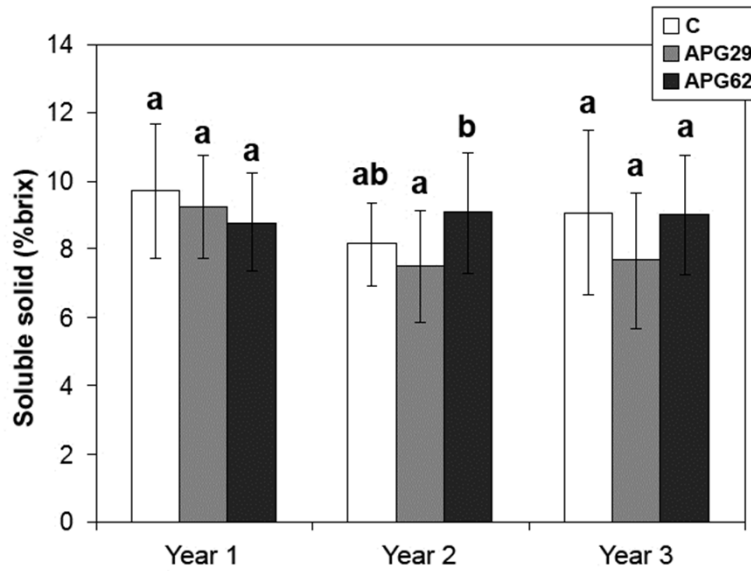

**Supplementary Figure 2:** Anthocyanin content, estimated as mg Pg-3-glu per 100 g of fruit, of control and transgenic ripe fruits from the APG29 and APG62 lines were evaluated for two years. Data represent the means  $\pm$  SD of three replicates per line/year. Bars with different letters within each year are significantly different by the Tukey-HSD test ( $P = 0.05$ ).

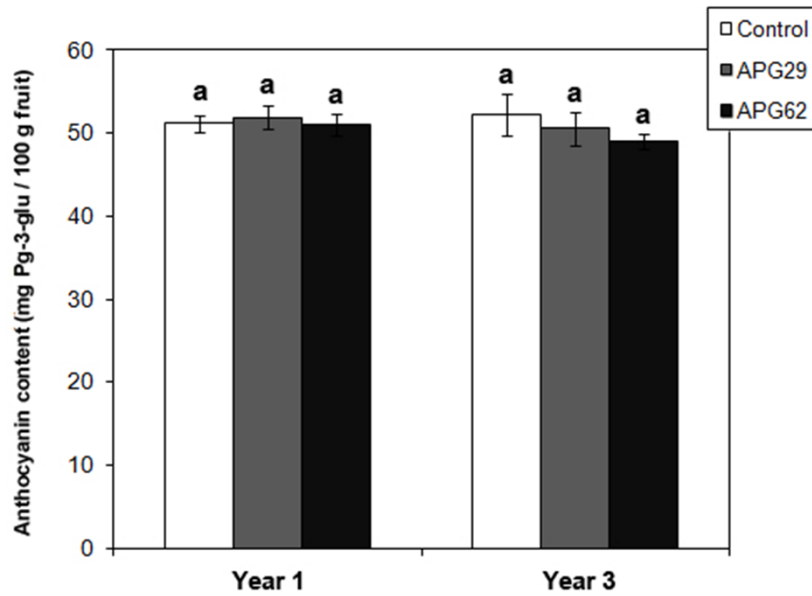

**Supplementary Figure 3:** Pectin content, expressed as mg UA per 100 mg of CWM, in the cell wall fractions obtained from control and transgenic ripe fruits. The soluble pectins correspond to the amount of PAW plus the water fractions.

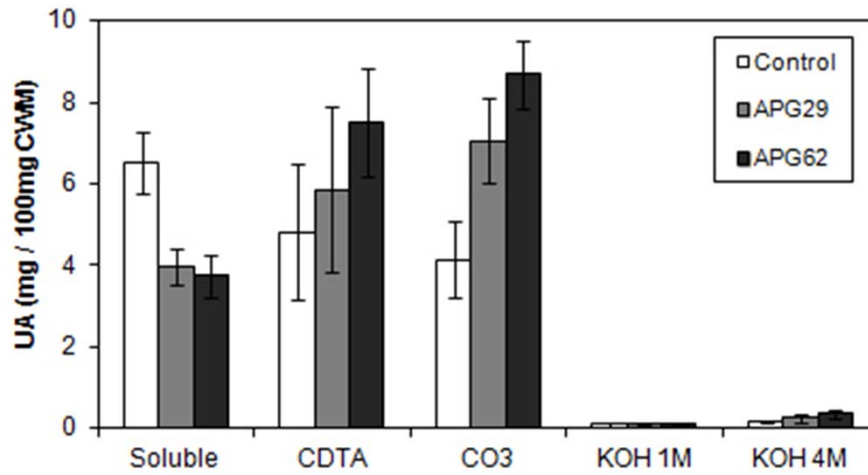

**Supplementary Figure 4:** Molecular mass profiles of xyloglucans extractable by 1 M KOH (A,B) and 4 M KOH (C,D) from fruit cell walls of control and two independent APG transgenic lines. Profiles were obtained by gel filtration chromatography on Sepharose CL2B. The xyloglucan content in each fraction was assessed by the iodine method. The elution volumes for the different standards and acetone used for column calibration are presented.

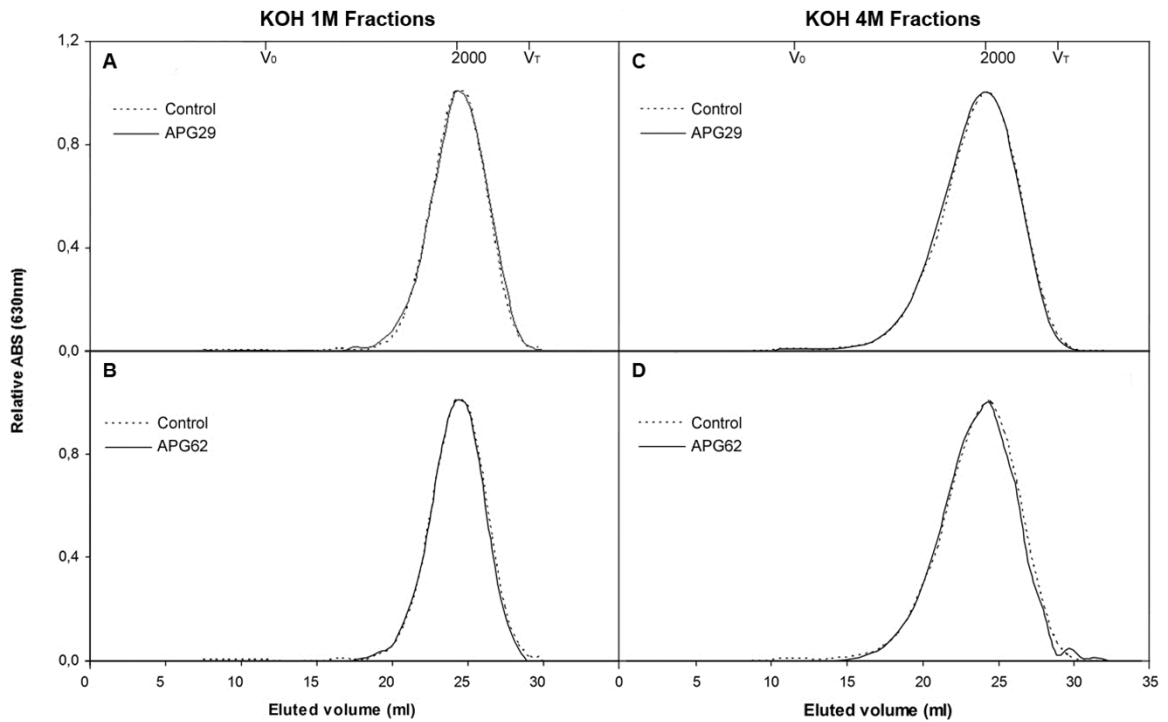

Supplement: supp_ert210_jexbot099036_file001.pdf [file supp_ert210_jexbot099036_file001.pdf]
